# Supplementary material for: Plasmid-based and -free methods using CRISPR/Cas9 system for replacement of targeted genes in Colletotrichum sansevieriae
Source: PubMed Central journal article supplement (PMC6908651; doi:10.1038/s41598-019-55302-8), 2019-12-12
Supplement: 41598_2019_55302_MOESM1_ESM.pdf [file 41598_2019_55302_MOESM1_ESM.pdf]

## Supplementary Information

Plasmid-based and -free methods using CRISPR/Cas9 system for replacement of targeted gene in *Colletotrichum sansevieriae*

Masayuki Nakamura\*, Yuta Okamura, Hisashi Iwai

Faculty of Agriculture, Kagoshima University, Kagoshima, Japan

\* Corresponding author

E-mail: [masa@agri.kagoshima-u.ac.jp](mailto:masa@agri.kagoshima-u.ac.jp)

**Table S1. Primers used in this study.**

| Construction of pSCD1-G418                                       |                           |                                                  |
|------------------------------------------------------------------|---------------------------|--------------------------------------------------|
| Primer name                                                      | Gene                      | Sequence (5'- 3')                                |
| G418-inf-F                                                       | <i>NPTII</i>              | cggtatcgat <i>AAGCTT</i> TGCCATTAACCTAGGTACAG    |
| G418-inf-R                                                       | <i>NPTII</i>              | attcgatc <i>AAGCTT</i> CAAGAGCGGATTCCTCAGTC      |
| SCD1-Pro-inf-KpnI-F                                              | <i>SCD1</i><br>upstream   | gggcgaattg <i>GATACC</i> TGGTCGTTTCGAACTGGGTAG   |
| SCD1-Pro-inf-KpnI-R                                              | <i>SCD1</i><br>upstream   | gggggggccc <i>GATACC</i> GAAGGTGATGTTGCCAGCAG    |
| SCD1-Ter-inf-EV-F                                                | <i>SCD1</i><br>downstream | cgataagctt <i>GATATC</i> GCTACAACATGCACTGGTAC    |
| SCD1-Ter-inf-EV-R                                                | <i>SCD1</i><br>downstream | gcaggaattc <i>GATATC</i> CTGATGGGACGTTCCGATTG    |
| Construction of pCas9 using pFC332 as a template                 |                           |                                                  |
| Cas9-inf-EV-F                                                    | <i>Cas9</i>               | atcgataagctt <i>GATATC</i> CGAGACAGCAGAATCACCGC  |
| Cas9-inf-EV-R                                                    | <i>Cas9</i>               | ctgcaggaattc <i>GATATC</i> GTATTGGGATGAATTTTGTGA |
| Construction of pCas9-sgRNA-tg1, -tg2, -tg3, and pG418-sgRNA-tg1 |                           |                                                  |
| U6 Pro1046-inf-SpeI                                              | U6 snRNA<br>promoter      | cggggatcc <i>ACTAGT</i> TGGGCCTACGCAAACATGCG     |
| U6 Pro1046-SCD1-tg1-B                                            | U6 snRNA<br>promoter      | TGGAGTCGTAGCTGTCAGCCGAAAGTCTGTGGTAAAAGTG         |
| SCD1-tg1-gRNA-C                                                  | sgRNA (tg1)               | GGCTGACAGCTACGACTCCAGTTTTAGAGCTAGAAATAGC         |
| gRNA-U6Ter-D                                                     | sgRNA (tg1)               | GCATCAAAAAGGAAAAAAAAGCACCGACTCGGTGCCACTT         |
| U6 Ter1046-E                                                     | U6 snRNA<br>terminator    | AAGTGGCACCGAGTCGGTGCTTTTTTTTTCCTTTTGTATGC        |
| U6 Ter1046-inf-SpeI                                              | U6 snRNA<br>terminator    | ccgctctaga <i>ACTAGT</i> GGACGAGTGCGGAAAAGGCG    |
| U6 Pro1046-SCD1-tg2-B                                            | U6 snRNA<br>promoter      | GGGCGATGCACTTGCAGGAGACGAAAGTCTGTGGTAAAAGTG       |
| SCD1-tg1-gRNA-C                                                  | sgRNA (tg2)               | TCTCCGCAAGTGCATCGCCGTTTTAGAGCTAGAAATAGCAAGTT     |
| U6 Pro1046-tg3-B                                                 | U6 snRNA<br>promoter      | AGATCATGGCAATGAACTCCGAAAGTCTGTGGTAAAAGTG         |
| SCD1-tg3-gRNA-C                                                  | sgRNA (tg3)               | GGAGTTCATTGCCATGATCTGTTTTAGAGCTAGAAATAGC         |
| Amplification of donor DNAs using pSCD1-G418 as a template       |                           |                                                  |

|                                                                         |                           |                                               |
|-------------------------------------------------------------------------|---------------------------|-----------------------------------------------|
| SCD1-up-1500-F                                                          | <i>SCD1</i><br>upstream   | TGGTCGTTCGAACTGGGTAG                          |
| SCD1-down-1500-F                                                        | <i>SCD1</i><br>downstream | CTGATGGGACGTTCCGATTG                          |
| SCD1-up-1000-F                                                          | <i>SCD1</i><br>upstream   | AACACTTGCGTGACATCCTG                          |
| SCD1-down-1000-F                                                        | <i>SCD1</i><br>downstream | ATGGCAGGTCAAATAACCC                           |
| SCD1-up-500-F                                                           | <i>SCD1</i><br>upstream   | TCAGTCGCCGACGTAAGTTG                          |
| SCD1-down-500-R                                                         | <i>SCD1</i><br>downstream | CTTCGTCTGTAGAGACTGTC                          |
| SCD1-up-50-F                                                            | <i>SCD1</i><br>upstream   | TAATACACGGCGCATTCCGA                          |
| SCD1-down-50-R                                                          | <i>SCD1</i><br>downstream | GGCGAACTCCACACGCCGT                           |
| Construction of sgRNA-encoding DNAs using pCas9-sgRNA-tg1 as a template |                           |                                               |
| T7-gRNA-synthesis-F                                                     | sgRNA<br>(tg1)            | CTAATACGACTCACTATAGGGCTGACAGCTACGACTCCA       |
| gRNA-synthesis-R                                                        | sgRNA<br>(tg1)            | AAAAGCACCGACTCGGTGCC                          |
| Confirmation for gene replacements of <i>SCD1</i>                       |                           |                                               |
| SCD1-F                                                                  | <i>SCD1</i>               | TCCTCTAAGGTGGCCATGAC                          |
| SCD1-R                                                                  | <i>SCD1</i>               | ACACAGCCTCGAAGTCGTAC                          |
| Confirmation for integration of <i>Cas9</i> and sgRNA                   |                           |                                               |
| Cas9-F                                                                  | <i>Cas9</i>               | GGGATTCTCAGACCGTCAA                           |
| Cas9-R                                                                  | <i>Cas9</i>               | AGCCAGCCTTATCGAGTTCA                          |
| gRNA-F                                                                  | sgRNA                     | GGGATTACGACAAGCTAGTC                          |
| gRNA-R                                                                  | sgRNA                     | CAAGTTGATAACGGACTAGC                          |
| Replacement of <i>NIS1</i>                                              |                           |                                               |
| CsNIS1-Pro-KpnI-F                                                       | <i>NIS1</i><br>upstream   | gggcgaattg <i>GGTACC</i> AGATGGGAAGCACTTGCAAC |
| CsNIS1-Pro-KpnI-R                                                       | <i>NIS1</i><br>upstream   | gggggggcc <i>GGTACC</i> TATTGTGCAGTTGCTGTGAG  |
| CsNIS1-Ter-EV-F                                                         | <i>NIS1</i><br>downstream | cgataagctt <i>GATATC</i> ACAATGTCACCGTCAATGTG |
| CsNIS1-Ter-EV-R                                                         | <i>NIS1</i>               | gcaggaattc <i>GATATC</i> TGGGACGTAGTAAGTTTACG |

|                             |                         |                                               |
|-----------------------------|-------------------------|-----------------------------------------------|
|                             | downstream              |                                               |
| U6 Pro-CsNIS1-tg1-B         | U6 snRNA promoter       | GGACGGACTGGACGTAGTTCGAAAAGTCTGTGGTAAAAGTG     |
| CsNIS1-tg1-gRNA-C           | sgRNA ( <i>NIS1</i> )   | GAACTACGTCCAGTCCGTCGGTTTTAGAGCTAGAAATAGC      |
| CsNIS1-F                    | <i>NIS1</i>             | ACTAGATGAGACGAGCAAAC                          |
| CsNIS1-R                    | <i>NIS1</i>             | CGCCATTCATATGCAGCATG                          |
| Replacement of <i>MC69</i>  |                         |                                               |
| CsMC69-Pro-KpnI-F           | <i>MC69</i> upstream    | gggcgaattg <i>GGTACC</i> CAGCATCGATAGCAGCGTAG |
| CsNIS1-Pro-KpnI-R           | <i>MC69</i> upstream    | gggggggccc <i>GGTACC</i> CATCGTCAGGAGAGCTAATG |
| CsMC69-Ter-EV-F             | <i>MC69</i> downstream  | cgataagctt <i>GATATC</i> CCAGGCCTTTGCGAAGATGA |
| CsMC69-Ter-EV-R             | <i>MC69</i> downstream  | gcaggaattc <i>GATATC</i> GAGATGGTGTGTGCGGTATG |
| U6 Pro-CsMC69-tg1-B         | U6 snRNA promoter       | ACCCAGGCGACTGCTTCTTCGAAAAGTCTGTGGTAAAAGTG     |
| CsMC69-tg1-gRNA-C           | sgRNA ( <i>MC69</i> )   | GAAGAAGCAGTCGCCTGGGTGTTTTAGAGCTAGAAATAGC      |
| CsMC69-F                    | <i>MC69</i>             | GTCCTTGCAATGCCCTTGTC                          |
| CsMC69-R                    | <i>MC69</i>             | TGACGTGGAAGTGTGAGAAC                          |
| Replacement of <i>Cel5A</i> |                         |                                               |
| Cel5A-Pro-KpnI-F            | <i>Cel5A</i> upstream   | gggcgaattg <i>GGTACC</i> CGTGGGAAATTCAAAGACCG |
| Cel5A-Pro-KpnI-R            | <i>Cel5A</i> upstream   | gggggggccc <i>GGTACC</i> CCTTGAATGAGTGACGAGAG |
| Cel5A-Ter-EV-F              | <i>Cel5A</i> downstream | cgataagctt <i>GATATC</i> CCAACGACAAGGTCATCTTC |
| Cel5A-Ter-EV-R              | <i>Cel5A</i> downstream | gcaggaattc <i>GATATC</i> GACATTCCTCGCTGCAGAG  |
| U6 Pro- Cel5A-tg1-B         | U6 snRNA promoter       | GTGTTGTTTCAGAATGACTACGAAAAGTCTGTGGTAAAAGTG    |
| Cel5A-tg1-gRNA-C            | sgRNA ( <i>Cel5A</i> )  | GTAGTCATTCTGAACAACACGTTTTAGAGCTAGAAATAGC      |
| Cel5A-F                     | <i>Cel5A-F</i>          | GACTGGAATGTGGAAGTAGG                          |
| Cel5A-R                     | <i>Cel5A-F</i>          | CCAGATCCAGTTCTCAGCAC                          |

| Replacement of <i>g9136</i> |                            |                                               |
|-----------------------------|----------------------------|-----------------------------------------------|
| g9136-Pro-KpnI-F            | <i>g9136</i><br>upstream   | gggcgaattg <i>GGTACC</i> TAATGTCTCTCCTGACGGAT |
| g9136-Pro-KpnI-R            | <i>g9136</i><br>upstream   | gggggggccc <i>GGTACC</i> CGGTAGAGTATTCCGAAGAC |
| g9136-Ter-SmaI-F            | <i>g9136</i><br>downstream | attcctgcag <i>CCCGGG</i> AAAGCTGACGCACATCTCAG |
| g9136-Ter-SmaI-R            | <i>g9136</i><br>downstream | tagtggatcc <i>CCCGGG</i> CGATCGTCTGTACCTTACGC |
| U6 Pro-g9136-tg1-B          | U6 snRNA<br>promoter       | TTGTCGGTGCTGCCATCGCCGAAAGTCTGTGGTAAAAGTG      |
| g9136-tg1-gRNA-C            | sgRNA<br>( <i>g9136</i> )  | GGCGATGGCAGCACCCGACAAGTTTTAGAGCTAGAAATAGC     |
| g9136-F                     | <i>g9136</i>               | CGACAACGAGATCCTTAATG                          |
| g9136-R                     | <i>g9136</i>               | GACGACGTCAACTTACTACC                          |

Lowercase sequences are homologous to vector ends. Italicized sequences represent restriction enzyme sites.

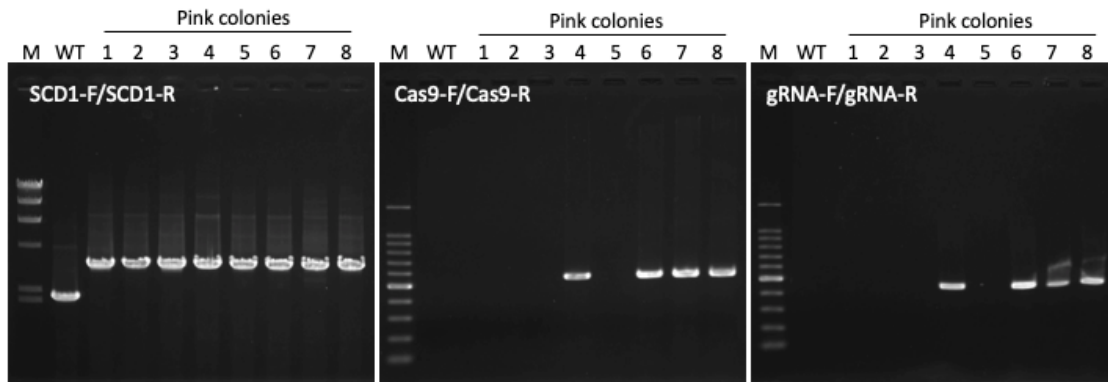

Figure S1. Full length gel images of the gels shown in Fig. 3d. Confirmation of *SCD1* replacement (left), Cas9-cassette integration (middle) and sgRNA-cassette integration (right) by PCR. Primers used are shown on the upper left. Gene replacement was caused by using pSCD1-G418 and pCas9-sgRNA-tg1 through the plasmid-based system.

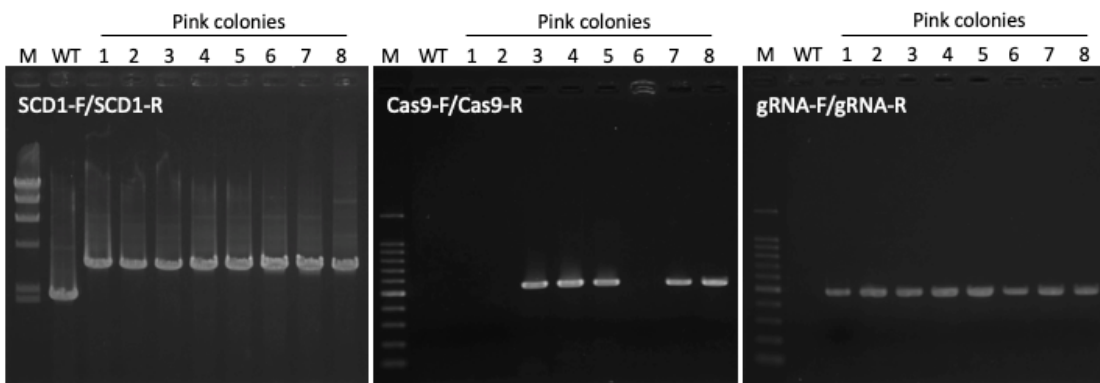

Figure S2. Full length gel images of the gels shown in Fig. 4c. Confirmation of *SCD1* replacement (left), Cas9-cassette integration (middle) and sgRNA-cassette integration (right) by PCR. Primers used are shown on the upper left. Gene replacement was caused by using pCas9 and pG418-sgRNA-tg1 through the plasmid-based system.

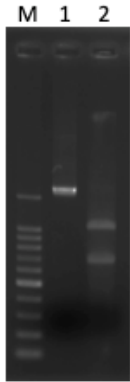

Figure S3. Full length gel image of the gel shown in Fig. 6a. Digestion of *SCD1* fragments without the Cas9/sgRNA complex (lane 1) or with the complex (lane 2).

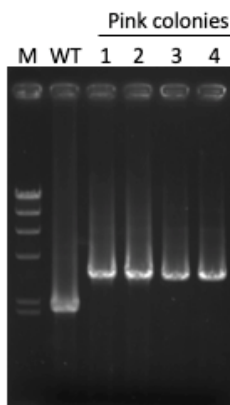

Figure S4. Full length gel image of the gel shown in Fig. 6d. Confirmation of *SCD1* replacement by PCR. Gene replacement was caused by the plasmid-free system (Cas9/sgRNA complexes).

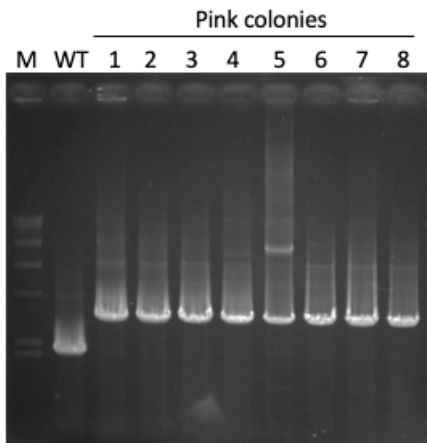

Figure S5. Full length gel image of the gel shown in Fig. 7c. Confirmation of *SCD1* replacement by PCR. Gene replacement was caused by the hybrid system (Cas9 protein and donor DNA-sgRNA expression plasmid).

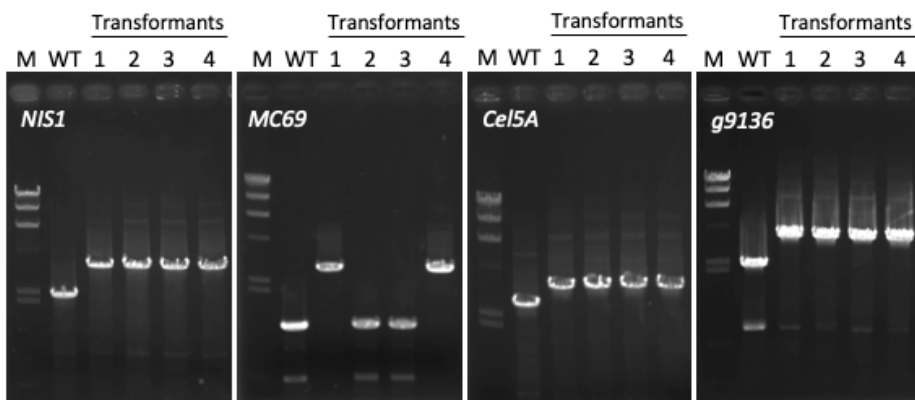

Figure S6. Full length gel images of the gels shown in Fig. 8. PCR analyses of replacement events for *NIS1*, *MC69*, *Cel5A*, and *g9136*. Gene replacements were caused by the hybrid system.
